1 **Full title: An outbreak of SARS-CoV-2 with high mortality in mink (*Neovison***  
2 ***vison*) on multiple Utah farms**

3

4 **Short title: SARS-CoV-2 outbreak in Utah mink farms**

5

6 **Authors:** Chrissy Eckstrand<sup>1\*</sup>, Tom Baldwin<sup>2</sup>, Mia K Torchetti<sup>5</sup>, Mary Lea Killian<sup>5</sup>, Kerry A.  
7 Rood<sup>3</sup>, Michael Clayton<sup>2</sup>, Jason K. Lott<sup>4</sup>, Rebecca M Wolking<sup>1</sup>, Daniel S Bradway<sup>1</sup>, Timothy  
8 Baszler<sup>1\*</sup>

9

10 **Affiliations:**

11 <sup>1</sup>Washington Animal Disease Diagnostic Laboratory, Washington State University, Pullman,  
12 WA 99163, USA.

13 <sup>2</sup>Utah Veterinary Diagnostic Laboratory, Utah State University, Logan, UT 84341, USA.

14 <sup>3</sup>Utah State University, Animal, Dairy, and Veterinary Sciences, Logan, UT 84341, USA.

15 <sup>4</sup>Fur Breeders Agricultural Cooperative, Logan, UT 84321, USA.

16 <sup>5</sup>National Veterinary Services Laboratories, Ames, IA 50010, USA.

17 \*Correspondence to: [chrissy.eckstrand@wsu.edu](mailto:chrissy.eckstrand@wsu.edu), [baszlert@wsu.edu](mailto:baszlert@wsu.edu)

18 †Additional author notes should be indicated with symbols (e.g., for equal contributions or  
19 current addresses).

20

21 **Keywords:** SARS-CoV-2, COVID, viral reservoirs, tissue tropism, mink, pathology

22           **Abstract (300 words):** The breadth of animal hosts that are susceptible to severe acute  
23 respiratory syndrome coronavirus 2 (SARS-CoV-2) and may serve as reservoirs for continued  
24 viral transmission are not known entirely. In August 2020, an outbreak of SARS-CoV-2 occurred  
25 in multiple mink farms in Utah and was associated with high mink mortality and rapid viral  
26 transmission between animals. The outbreak's epidemiology, pathology, molecular  
27 characterization, and tissue distribution of virus within infected mink is provided. Infection of  
28 mink was likely by reverse zoonosis. Once established, infection spread rapidly between  
29 independently housed animals and farms, and caused severe respiratory disease and death.  
30 Clinical signs were most notably sudden death, anorexia, and increased respiratory effort. Gross  
31 pathology examination revealed severe pulmonary congestion and edema. Microscopically there  
32 was pulmonary edema with moderate vasculitis, perivasculitis, and fibrinous interstitial  
33 pneumonia. Reverse transcriptase polymerase chain reaction (RT-PCR) of tissues collected at  
34 necropsy demonstrated the presence of SARS-CoV-2 viral RNA in multiple organs including  
35 nasal turbinates, lung, tracheobronchial lymph node, epithelial surfaces, and others. Whole  
36 genome sequencing from multiple mink was consistent with published SARS-CoV-2 genomes  
37 with few polymorphisms. The Utah mink SARS-CoV-2 strain fell into Clade GH, which is  
38 unique among mink and other animal strains sequenced to date and did not share other spike  
39 RBD mutations Y453F and F486L found in mink. Localization of viral RNA by *in situ*  
40 hybridization revealed a more localized infection, particularly of the upper respiratory tract.  
41 Mink in the outbreak reported herein had high levels of virus in the upper respiratory tract  
42 associated with mink-to-mink transmission in a confined housing environment and were  
43 particularly susceptible to disease and death due to SARS-CoV-2 infection.

44

45           **Author Summary (150 words – nontechnical summary):** The recent emergence and  
46 worldwide spread of the novel coronavirus has resulted in worldwide disease and economic  
47 hardship. The virus, known as SARS-CoV-2 is believed to have originated in bats and has spread  
48 worldwide through human-to-human virus transmission. It remains unclear which animal  
49 species, other than humans, may also be susceptible to viral infection and could naturally  
50 transmit the virus to susceptible hosts. In this study, we describe an outbreak of disease and death  
51 due to SARS-CoV-2 infection in farmed mink in Utah, United States. The investigation reveals  
52 that mink can spread the virus rapidly between animals and that the disease in mink is due to the  
53 viral infection and damage to tissues of the upper and lower respiratory system. The  
54 determination that mink are susceptible to SARS-CoV-2 indicates the need for strict biosecurity  
55 measures on mink farms to remediate mink-to-mink and human-to-mink transmission for the  
56 protection of mink, as well as prevent potential transmission from mink to humans.

57  
58           **Introduction:** Since December 2019, worldwide spread of a novel coronavirus  
59 designated as severe acute respiratory syndrome coronavirus 2 (SARS-CoV-2) has resulted in  
60 significant human disease, death, and economic loss [1]. Phylogenetic evidence suggests that  
61 SARS-CoV-2 may have jumped from the Intermediate Horseshoe Bat (*Rhinolophus affinis*) to  
62 human beings, likely via an undetermined intermediate host [2–4]; if proven, this is an example  
63 of a generalist coronavirus broadening its host range. Other broadening coronavirus events in  
64 recent history include the 2002 emergence of Severe Acute Respiratory Syndrome – associated  
65 coronavirus (SARS-CoV) from a wildlife bat reservoir in China [5], and the 2012 emergence of  
66 Middle Eastern Respiratory Syndrome (MERS) from wild bats in Saudi Arabia [6]. SARS-CoV  
67 has a broad susceptible host range including naturally infected human beings, civet cats and

68 raccoon dogs, and experimentally infected rhesus macaques, ferrets, mice, cats and hamsters [7–  
69 13]. Similarly, MERS is found in animal reservoir hosts such as bats, and dromedary camels  
70 [14]. As countries continue to modify infection control and public health strategies for  
71 containment of SARS-CoV-2, sources of viral transmission from domestic and wildlife animal  
72 reservoirs are of great interest. Natural and experimental SARS-CoV-2 infection studies  
73 demonstrate susceptibility of rhesus macaques, cats, dogs, ferrets, mice, tree-shrews, Egyptian  
74 fruit bats and Syrian guinea pigs and mink to the virus with variable permissiveness and  
75 expression of clinical disease; while pigs, poultry and cattle do not appear to be susceptible [15–  
76 25]. Investigations into the distribution of virus in experimental infected cats, ferrets and  
77 macaques demonstrate that viral RNA can be detected by polymerase chain reaction (PCR) in  
78 many organ systems, most notably the upper respiratory tract, lung and intestines [15,16,26].  
79 SARS-CoV-2 viral proteins have been identified by immunohistochemistry (IHC) in nasal  
80 turbinates, trachea, lung and the lamina propria of intestines of experimentally infected ferrets  
81 [16] and lung, mediastinal lymph nodes and intestines of macaques [26]. Infectious viral  
82 particles have been recovered from nasal turbinates, nasal fluid, saliva, and lungs, but not from  
83 trachea, kidney and intestinal tissues of experimentally infected ferrets [16].

84         While these experimental studies provide valuable information regarding disease  
85 pathogenesis and possible animal reservoirs, the true risk of SARS-CoV-2 transmission between  
86 these species and human beings in natural settings remains undetermined. Natural SARS-CoV-2  
87 infections have been reported in domestic dogs and cats, as well as large cats and great apes in  
88 zoological facilities [27–31]. The origin of infections in these settings has been attributed to  
89 human SARS-CoV-2 transmitting to animals. SARS-CoV-2 infections have also been reported in  
90 farmed mink worldwide, including the United States [32–36]. The index report from the

91 Netherlands indicated respiratory disease and increased mortality in two mink farms in the  
92 Netherlands due to natural SARS-CoV-2 infection [17]. The Netherlands' mink outbreak  
93 investigation revealed viral RNA and protein present in multiple organ systems, most  
94 consistently detectable in respiratory system [17,37], and rapid transmission between mink in the  
95 mink facilities. Full-length viral genome sequencing from farmed mink SARS-CoV-2 outbreaks  
96 in the Netherlands and Denmark suggested novel virus variants with transmission between mink  
97 and humans and potential increased possibility of spread in this environment [34,38]. A new  
98 SARS-CoV-2 strain called "Cluster 5", was identified in mink in Denmark that was also present  
99 in the human population raising concerns of a higher risk of people working on mink farms.

100 In August 2020 multiple mink farms in Utah experienced a sudden increase in animal  
101 mortality attributed to natural SARS-CoV-2 infection. The epidemiological information  
102 associated with the outbreak, gross and histopathologic lesions, tissue distribution of viral RNA,  
103 and genomic sequencing of the virus are described herein. The report details a large-scale natural  
104 infection outbreak of SARS-CoV-2 resulting in significant inter-animal transmission, disease and  
105 death in a susceptible animal species in the United States. Subsequent to this outbreak there have  
106 been reports of SARS-CoV-2 infection on mink farms in Oregon, Wisconsin and Michigan [39].

107

108

## 109 **Results**

110 **Premise and animal information:** The outbreak of disease associated with SARS-CoV-  
111 2 infection began in August 2020. Five mink farms were included in this investigation in which  
112 two farms had a common producer and the others were operated independently. Three premises  
113 had common labor between farms and were in close physical proximity (approximately 400

114 meters). Farms each had perimeter fences, locked gates, and access only to authorized personnel.  
115 Mink were housed in roof-covered sheds with ventilation to the outdoors through open side  
116 walls. Adult animals were held either individually or coupled in wire mesh cages with an  
117 approximately 1-inch space between cages to prevent inter-animal aggression, but nose-to-nose  
118 contact between neighboring animals was possible. Diets were comprised of offal and a  
119 carbohydrate source and were mixed in two distinct kitchens distributed daily to the five farms.  
120 Watering systems were variable between premises and animals had either individual nipple  
121 waterers, individual water dishes or a trough system. Mink were vaccinated annually against  
122 *Clostridium botulinum*, mink enteritis virus, canine distemper virus, and *Pseudomonas*  
123 *aeruginosa*. Aleutian mink disease virus was intermittently identified as a cause of disease on the  
124 farms and considered a possible comorbidity. Wildlife, including skunks and raccoons, were  
125 intermittently observed on the premises and eliminated on an as-needed basis. Feral cats were  
126 commonly present on premises to assist with rodent control.

127 Clinical disease, including death, was observed in adult breeding animals ranging in age  
128 from 1-5 years, while young-of-the-year kits were overwhelmingly unaffected by the virus. The  
129 first sign noted by producers was an abrupt increase in the overall mortality rate. The mortality  
130 rate ranged from 35-55% in the adult-aged mink, which normally ranges between 2 and 6%. On  
131 one premise the mortality rate in female mink was 1.8 times greater than males. An increase in  
132 respiratory effort was notable in diseased mink characterized by gasping or increased abdominal  
133 effort. Upper respiratory signs included nasal and ocular discharge (Fig 1a), and coughing was  
134 present, but was variable between farms. There was no report of gastroenteritis. Survival with  
135 resolution of respiratory disease was observed in some animals without observable lasting

136 effects, however the frequency of this occurrence is unknown. The source of the virus was  
137 presumed to be due to reverse zoonosis of the virus from infected workers [31].

138

139 **Pathology:** A total of 20 mink, both female and male, from five farms were necropsied  
140 (examined postmortem). Given the clinical suspicion of SARS-CoV-2 infection and the potential  
141 risk to human prosectors, necropsies were performed with personal protective equipment in  
142 accordance with biosafety level 3 practices (conducted in Class II biosafety cabinet with  
143 appropriate primary barriers and personal protective equipment including clothing, gloves, eye,  
144 face and respiratory protection). Mink were generally in good body condition based on adipose  
145 tissue stores and muscling. In all mink, lung lobes were uniformly (most common) or variably  
146 dark red, heavy, and failed to collapse (Fig 1b). Abundant clear fluid escaped when lung lobes  
147 were incised, and tracheas contained variable amounts of white froth (pulmonary edema).

148 Histopathological examination revealed multifocal interstitial and perivascular  
149 pneumonia (Fig 2a) and variable amounts of alveolar edema (Fig 2b) in all mink. Occasional  
150 fibrin strands overlay necrotic alveolar pneumocytes. Proliferative type II pneumocytes  
151 infrequently lined other alveolar septa (Fig 2c). Low to moderate numbers of neutrophils and  
152 macrophages plus moderate amounts of fibrin were in multiple alveolar spaces (Fig 2d). In  
153 nearly all pulmonary arterioles, edema fluid and moderate numbers of lymphocytes and plasma  
154 cells widely separated collagen fibers of the tunica adventitia. Sporadic vessels had mural  
155 fibrinoid degeneration. Additional findings included mild, diffuse, catarrhal to necrotizing  
156 enterocolitis (5/20 mink), moderate, multifocal, splenic lymphoid necrosis (5/20 mink), severe  
157 acute centrilobular hepatic congestion (4/20 mink), focal perivascular lymphocytic meningitis  
158 (1/20 mink), severe necrotizing and suppurative bridging centrilobular hepatitis (1/20 mink) and

159 myocardial interstitial fibrosis and fatty infiltration (1/20 mink). Severe suppurative rhinitis with  
160 multifocal attenuation and loss of epithelial cells was noted on histopathological examination of  
161 nasal turbinates from two mink.

162

163 **Tissue Distribution of SARS-CoV-2 by RT-PCR:** The initial detection of SARS-CoV-  
164 2 infection was from deep nasopharyngeal swabs and fresh lung tissue from five necropsied  
165 mink from two farms by RT-PCR. Subsequent to this initial diagnosis multiple additional tissues  
166 from four necropsied animals were collected in Trizol for further investigation of viral tissue  
167 distribution by RT-PCR (designated mink 1-4). Viral RNA was detected in many tissues from  
168 multiple mink (Fig. 3a). Tissues where SARS-CoV-2 viral RNA was consistently detected  
169 between animals included nasal turbinates and lung, where nasal turbinates had a lower cycle  
170 threshold detectability than lung. Other tissues where viral RNA was detected included the  
171 retropharyngeal lymph node (3/4 mink), tracheobronchial lymph node (3/4 mink), squamous  
172 tissue from the distal nose (3/4 mink), paw pads (3/4 mink), and brain (3/4 mink). Detectible  
173 viral RNA was observed in other tissues with less frequency between animals. Once it was  
174 identified that nasal turbinates from two of the initially sampled mink (mink 3 and 4) had very  
175 low Ct detectability by RT-PCR (interpreted as a high viral load), RT-PCR was performed on  
176 formalin-fixed paraffin embedded (FFPE) sections of nasal turbinates from two additional mink  
177 (mink 5 and 6), where SARS-CoV-2 RNA was also detected.

178

179 **Virus Sequence Analysis:** Whole genome viral sequences from all of the mink farms  
180 were identical. Mutational analysis was performed using the GISAID EpiFlu™ Database  
181 CoVsurver: Mutation Analysis of hCoV-19 at <https://www.gisaid.org/epiflu->



182 applications/covsurver-mutations-app. The SARS-CoV-2 viral sequences from the mink were in  
183 GISAID clade GH, with mutations at T85I-NSP2, S1205L-NSP3, G37E-NSP9, P323L-NSP12,  
184 T91M-NSP15, D614G-spike, N501T-spike, Q57H-NS3, H182Y-NS3, A38S-M, T205I-N, and  
185 Q289H-N as compared to hCoV-19/Wuhan/WIV04/2019. See Table 1 for all SNPs and aa  
186 mutations.

187

188 **Table 1: Mutations identified in the genome of Utah mink SARS-CoV-2 isolates.** SNPs and  
189 nonsynonymous mutations identified. Amino acid and codon numbering is relative to Wuhan-  
190 Hu-1.

191

| <b>Gene</b> | <b>Mutations</b> | <b>Mutation type</b>    |
|-------------|------------------|-------------------------|
| NSP2        | T85I             | amino acid substitution |
| NSP3        | S1206L           | amino acid substitution |
| NSP9        | G37E             | amino acid substitution |
| NSP12       | P323L            | amino acid substitution |
| NSP16       | T91M             | amino acid substitution |
| Spike       | N501T, D614G     | amino acid substitution |
| NS3         | Q57H, H182Y      | amino acid substitution |
| M           | A38S             | amino acid substitution |
| N           | T205I, Q289H     | amino acid substitution |
|             | C1059T           | SNP                     |
|             | C3037T           | SNP                     |
|             | C6336T           | SNP                     |
|             | G12795A          | SNP                     |
|             | C14408T          | SNP                     |
|             | C20930T          | SNP                     |
|             | A23064C          | SNP                     |
|             | A23403G          | SNP                     |
|             | G25563T          | SNP                     |
|             | C25936T          | SNP                     |
|             | C28887T          | SNP                     |

192

193

194           **Cellular Distribution of viral RNA in tissues:** SARS-CoV-2 RNA was detected by  
195 chromogenic *in situ* hybridization in multiple FFPE tissues (Fig 3b). The nasal turbinates and  
196 nasal passages of the two mink in which tissues were available for evaluation had abundant  
197 positive staining for viral RNA in the suppurative and catarrhal exudate within the nasal passages  
198 (Fig 4a-c), as well as in the respiratory epithelial cells of the most caudal nasal passage overlying  
199 nasal mucous glands (Figs 4d-f). In 4/4 mink there was positive detection of viral RNA in  
200 pulmonary bronchial epithelial cells or multifocally within the interstitium (Figs 4g-h). There  
201 was also positive detection of viral RNA in the tracheal epithelial cells of one mink 1 (Fig 4i-j).  
202 Other tissues where viral RNA was observed included the most superficial surface of the distal  
203 squamous nose (2/4 mink), the surface of the tongue (1/4 mink), and very little detection in the  
204 lumen of the colon (2/4 mink) and small intestine (1/4 mink). Thyroid gland, adrenal gland, eye,  
205 ovary, uterus and pancreas were examined from 1 mink by ISH (data not included in Fig 3b) in  
206 which viral RNA was not detected. Positive and negative tissue and reagent controls, as  
207 described in Materials and Methods, performed as expected.

208

209           **Discussion:** In this report we show that mink are highly susceptible to SARS-CoV-2  
210 infection with high mortality in a natural farm production setting. Furthermore, we describe the  
211 pathology and tissue distribution of the virus in infected animals. Since the emergence of SARS-  
212 CoV-2, mink have been the only animal species identified to develop significant disease and  
213 mortality associated with infection in the United States. The findings were associated with  
214 reverse zoonotic transmission (from humans to mink) similar to other SARS-CoV-2 infections  
215 reported in animals. The abundant mink-to-mink transmission occurring on multiple farms with  
216 high morbidity and mortality highlighted concerns regarding propagation of viral mutants with

217 greater fitness and virulence. In a recent Denmark investigation, SARS-CoV-2 infected mink,  
218 many that were asymptomatic, were suggested to serve as transmission vectors of a new mutated  
219 strain of virus to humans [34]. Preliminary viral molecular phylogeny and epidemiology studies  
220 of the Utah farms described herein has not identified the SARS-CoV-2 mutations associated with  
221 mink-to-human transmission in the Danish study.

222         The outbreaks of SARS-CoV-2 in farmed mink in April 2020 in the Netherlands and  
223 Denmark showed robust viral transmission, similar to what we have described here [17,34,37],.  
224 Mortality rates in our Utah outbreak were much higher (up to 55%), compared to the Netherlands  
225 outbreak, which reported 2.4% mortality at greatest, and the Danish outbreak, which showed  
226 minimal clinical disease and mortality [33,34]. Such a substantial difference in mortality may be  
227 due to the population of mink considered in the mortality rate (only adults were considered in  
228 this case, while young animals may be have included in the Netherland report), or other reasons  
229 such as differences in housing and management, comorbidities (such as infection with Aleutian  
230 Disease virus), or viral virulence. Since the outbreak of SARS-CoV-2 in the Utah mink there  
231 have been infections in multiple other mink farms in the United States including Oregon,  
232 Wisconsin and Michigan [39].

233         In our pathology investigations the most significant findings were observed in the  
234 respiratory tract, and death was attributed to pulmonary failure and edema. Histologically, the  
235 respiratory changes were typical of viral interstitial pneumonia with alveolar damage, consistent  
236 with the pulmonary histopathology described in the Netherlands mink outbreak [37]. One  
237 interesting histopathologic finding of note in our case not described in the Netherland outbreaks  
238 was the presence of perivascular mononuclear inflammatory cells, edema and rare vascular wall  
239 fibrinoid necrosis (vasculitis), which has been described in humans and experimentally infected

240 ferrets [15,40–42]. In a recent report of describing the pulmonary pathology from human Covid-  
241 19 deaths, a key histologic feature of was the presence of increased numbers of perivascular T-  
242 lymphocytes (termed pulmonary vascular endothelialitis), though this feature did not definitively  
243 distinguish it from influenza pneumonia [42]. Given some of the striking similarities between the  
244 pulmonary histopathology of SARS-CoV-2 infected mink and humans, and abundance of virus  
245 in the upper respiratory tract between species, mink should be considered as a very good natural  
246 disease model of human Covid-19 disease.

247         The finding of severe suppurative and catarrhal rhinitis observed in the infected Utah  
248 mink was also an interesting finding. Rhinitis has been described in association with SARS-  
249 CoV-2 infection in experimentally infected cats, but the nature of the inflammation was  
250 described as mononuclear rather than suppurative [15]. Examination of the nasal conchae in the  
251 Netherlands mink report revealed swelling and degeneration of epithelial cells with diffuse loss  
252 of cilia and mild inflammation, which wasn't further characterized [37]. In any case, significant  
253 differences were observed in the nasal inflammation between these two outbreaks, which should  
254 be addressed in future investigations.

255         The tissue distribution of virus investigated by RT-PCR reported herein revealed fairly  
256 consistent detection of viral RNA in upper and lower respiratory tissues. Interestingly, RT-PCR  
257 also detected viral RNA in the brain, spleen, and various lymph nodes of multiple mink. By ISH,  
258 viral RNA was localized to respiratory epithelial cells of nasal turbinates, trachea and bronchi  
259 with multifocal detection in the pulmonary interstitium of some mink. These cellular localization  
260 findings are similar to the Netherlands investigation, which demonstrated viral antigen in  
261 epithelial cells in the same locations [37]. In experimentally infected cats, ferrets and Syrian  
262 hamsters the distribution of viral antigen localization was similar [15,21]. In this case we also

263 identified viral RNA present on superficial epithelial surfaces of the distal nose, tongue and  
264 rarely within the lumen of the intestines by ISH, which we interpret as likely shedding from the  
265 infected nasal passage and passive surface accumulation or ingestion. This finding is interesting  
266 and may suggest that infectious virions are present on superficial epithelial surfaces and are  
267 potential sources of viral transmission. Detection of intact infectious virions would be necessary  
268 to prove this hypothesis. There were discrepancies in the tissue distribution of viral RNA as  
269 detected by RT-PCR and ISH in this report, which warrants further investigation. These  
270 differences could be due to a greater detection sensitivity by RT-PCR, contamination of samples  
271 during collection at necropsy and detection by RT-PCR, or viremia with rare or inconsistent  
272 detection in various tissue systems. In a recent study investigating the utility of RNA-ISH,  
273 immunohistochemistry and RT-PCR in humans infected with SARS-CoV-2, ISH had a  
274 sensitivity and specificity of 86.7% and 100% respectively compared to RT-PCR [43].  
275 Additionally, they report that RT-PCR and ISH consistently demonstrated the presence of viral  
276 RNA within pulmonary tissues, where viral RNA was not detected in any extrapulmonary tissues  
277 by either method. Another likely contributor to the differences we report here may be due to the  
278 small sample size of mink investigated, which is considered a limitation of this report.

279         Omitting 42 ambiguous bp reads in the stable NSP-9 region, all five viral whole genome  
280 sequences from the mink isolates were 100% identical with three human SARS-CoV-2 GenBank  
281 accessions from Washington State, MW474211, MW474212, and MW474111, and mutations  
282 discovered via GISAID analysis are identical between the mink isolates and these three human  
283 isolates. GISAID differentiates COVID-19 into three major clades: Clade S , Clade V and Clade  
284 G (originally prevalent in North America, Asia/Europe, and Europe, respectively), based on NS  
285 mutations at NS8\_L84S, NS3\_G251V and S\_D614G, respectively [44]. The G clade was

286 subsequently divided into GR clade containing N\_203-204: RG>KR and GH clade with  
287 NS3\_Q57H aa substitutions [45]. The Utah mink isolates fall into clade GH. Analysis via the  
288 CoV-GLUE website at <http://cov-glue.cvr.gla.ac.uk/#/home> {CoV-GLUE: A Web Application  
289 for Tracking SARS-CoV-2 Genomic Variation Joshua B Singer, Robert J Gifford, Matthew  
290 Cotten and David L Robertson Preprints 2020, 2020060225  
291 <https://doi.org/10.20944/preprints202006.0225.v1>} classifies this virus in the B.1 lineage of the  
292 Rambaut et al. lineage system. {Andrew Rambaut, Edward C Holmes, Áine O'Toole, Verity  
293 Hill, John T McCrone, Christopher Ruis, Louis du Plessis and Oliver G Pybus Nature  
294 Microbiology 2020 <https://doi.org/10.1038/s41564-020-0770-5>}. This lineage originally  
295 comprised the Italian outbreak before spreading to Europe and other parts of the world.

296 Twelve nonsynonymous sequence mutations were identified in the SARS-CoV-2 genome  
297 from the Utah mink isolates. The polyprotein ORF1ab T85I-NPS2 mutation is most common in  
298 the USA (56% of phase 2 viruses) and has spread to at least 37 countries during phase 2 of the  
299 pandemic [46]. The P323L-NSP12 mutation in the viral polymerase gene coevolved with the  
300 D614G-spike mutation also present in this mink strain to become the most prevalent variant in  
301 the world. The G614 variant of the spike is more infectious than the original Wuhan D614  
302 variant. Success of the P323L/ G614 variant suggests that the P323L mutation adds to the  
303 virulence of the G614 spike variant, although without increasing patient mortality. [47]. In  
304 addition to the highly prevalent D614G mutation, the mink isolate had a rare N501T spike  
305 mutation. GISAID reports that this mutation is related to host change and antigenic drift. N501T  
306 is located in the Receptor Binding Domain (RBD) of the spike glycoprotein, resulting in a  
307 moderate increase in ACE2 binding [48,49]. The NS3\_Q57H mutation is common in the USA  
308 and is predicted to be deleterious [50]. S1205L-NSP3, T91M-NSP15, H182Y-NS3, Q289H-N,

309 and A38S-M are rare mutations of unknown significance. Utah mink did not share other spike  
310 RBD mutations Y453F and F486L found in mink, nor did they have any of the common  
311 mutations reported from other mink throughout the world. These included five nsp2 aa  
312 substitutions (E352Q, A372V, R398C, A405T, and E743V), four in the nsp3 papain-like  
313 proteinase domain (P1096L, H1113Y, I1508V, and M1588K) one in the nsp5 3C-like proteinase  
314 domain (I3522V), one in the nsp9 RNA/ DNA binding domain (G4177E or R) one in the nsp15  
315 poly(U) specific endoribonuclease domain (A6544T), two in the nsp12 RNA-dependent RNA  
316 polymerase domain (M4588I and T5195I), and two in the nsp13 helicase domain (I5582V and  
317 A5770D). {Elaswad A, Fawzy M, Basiouni S, Shehata AA. Mutational spectra of SARS-CoV-2  
318 isolated from animals. PeerJ. 2020 Dec 18;8:e10609. doi: 10.7717/peerj.10609. PMID:  
319 33384909; PMCID: PMC7751428.} The more uncommon spike RBD N501T mutation from  
320 Utah mink has been found in four emergences within three lineages of mink samples. {Recurrent  
321 mutations in SARS-CoV-2 genomes isolated from mink point to rapid host-adaptation Lucy van  
322 Dorp, Cedric CS Tan, Su Datt Lam, Damien Richard, Christopher Owen, Dorothea Berchtold,  
323 Christine Orengo, François Balloux bioRxiv 2020.11.16.384743; doi:  
324 <https://doi.org/10.1101/2020.11.16.384743>}

325 With the exception of the common D614G mutation, the Utah mink have none of the  
326 multiple spike protein changes (deletion 69-70, deletion 145, N501Y, A570D, D614G, P681H,  
327 T716I, S982A, D1118H) defining human UK variant VUI 202012/01, which may have  
328 increased transmissibility compared to other variants, nor does it have any of the mutations  
329 defining novel human South African variant 501Y.V2 (spike RBD K417N, E484K, and  
330 N501Y)

331 In conclusion, our results indicate that mink are susceptible to SARS-CoV-2 infection  
332 and can readily transmit the virus between animals. Infected animals suffer from severe  
333 respiratory disease, similar to that which has been described in humans, as well as other  
334 experimentally infected animals. Further investigations should focus on investigating the  
335 immunology and vascular pathology associated with the development of disease in mink to  
336 potentially extrapolate findings for human health and other animals. The Utah mink SARS-CoV-  
337 2 strain is unique among mink and other animal strains sequenced to date. Identical strains found  
338 in Washington state humans may reflect zoonanthroponosis, and to date there is no evidence that  
339 viruses adapted to mink will impact human SARS-CoV-2 evolution. However, monitoring of  
340 mutations located within the RBD of the SARS-CoV-2 spike protein in mink is important for  
341 studying viral evolution and host-adaptation. Between August 2020 and the end of January 2021  
342 the N501T mutation increased in frequency of sequenced isolates in the United States from .01%  
343 to .30%, similar to the increase in N501Y mutations. Lastly, strict biosafety measures are  
344 warranted on mink farms to decrease viral transmission between animals and risk of transmission  
345 to humans, as well as decreasing animal losses due to SARS-CoV-2 infection.

346

## 347 **Materials and Methods**

348 **Pathology:** Deceased mink were submitted to the Utah Veterinary Diagnostic Laboratory  
349 for investigation of the cause of death. In most cases animals died acutely due to natural  
350 infection, and less commonly were euthanized by cervical dislocation when humane euthanasia  
351 was warranted according to Fur Commission USA standards. The mink were housed as distinct  
352 separate, private operations that fall outside of the IACUC approval required at universities. All  
353 farms were members of the Utah Fur Breeders Association, which is under the Fur Commission



354 USA and all members follow standard guidelines for the operation of mink farms in the United  
355 States, which includes best practices for care, biosecurity and euthanasia.  
356 At necropsy all body systems were examined by an ACVP-board certified anatomic pathologist  
357 (TB) and one anatomic pathology resident (MC) at the Utah Veterinary Diagnostic Laboratory.  
358 A full complement of tissues were collected from twenty mink and fixed in 10% neutral buffered  
359 formalin. Formalin fixed tissues were dehydrated in ethanol, embedded in paraffin wax,  
360 sectioned at 4  $\mu\text{m}$ , and stained with hematoxylin and eosin using standard histochemical  
361 techniques. For SARS-CoV-2 RT-PCR, an extended list of tissues were collected and placed into  
362 TRIZOL Reagent (ThermoFisher Scientific, Waltham, MA); Oronasal swabs were placed in  
363 viral transport medium (PrimeStore MTM; LongHorn Diagnostics).

364

365 **Swab sample extraction method:** Total nucleic acid was extracted from samples in 1  
366 mL of PrimeStore MTM [LongHorn Diagnostics] using MagMAX<sup>TM</sup>-96 Viral RNA Isolation  
367 Kit, per the manufacturer's instructions.

368

369 **Tissue sample extraction method:** RNA was extracted from fresh tissue samples in  
370 TRIZOL Reagent and formalin fixed paraffin embedded tissues using TRIzol<sup>TM</sup> reagent  
371 [ThermoFisher, Waltham, MA 02451], per the manufacturer's instructions. FFPE tissues were  
372 cut in 10 $\mu\text{m}$  sections and heated at 65°C for 10 minutes in Trizol prior to RNA extraction using  
373 MagMAX<sup>TM</sup>-96 Viral RNA Isolation Kit, per the manufacturer's instructions.

374

375 **RT-PCR conditions:** Reverse transcriptase (RT) real-time PCR to the SARS-CoV-2  
376 RNA-dependent RNA polymerase gene (RDRp) was performed as previously described using

377 primers SARS-CoV-2 primers RdRp\_SARSr-F2 5'-GTGARATGGTCATGTGTGGCGG-3' and  
378 COVID-410R 5'-CCAACATTTTGCTTCAGACATAAAAAC-3' [51], using TaqMan Fast  
379 Virus 1-Step Master Mix Kit [Thermo Fisher]. RNA amplification was done using ABI 7500  
380 Fast (ThermoFisher, Waltham, MA 02451). Controls included positive extraction control  
381 (RdRp\_GATTAGCTAATGAGTGTGCTCAAGTATTGAGTGAAATGGTCATGTGTGGCGG  
382 TTCACTATATGTTAAACCAGGTGGAACCTCATCAGGAGATGCCACAACCTGCTTATGC  
383 TAATAGTGTTTTTAACATTTGTCAAGCTGTCACGGCCAATGTTAATGCACTTTTATCT  
384 ACTGATGGTAACAAAATTGCCGATAAGTATGTCCGCAATTTAC, negative extraction  
385 control (PCR water), positive amplification control (SARS-CoV-2 whole genome RNA), and  
386 negative amplification control (No template control). Graphs and tabular Ct results were  
387 reviewed on the ABI 7500 program. Unknown samples were considered positive if they rose  
388 above the threshold by cycle 45. All others were considered negative.

389

390 **Whole Genome Sequencing:** Libraries for the whole genome sequencing were generated  
391 using the Ion AmpliSeq Kit for Chef DL8 and Ion AmpliSeq SARS-CoV-2 Research Panel  
392 (Thermo Scientific, Waltham, MA). Libraries were sequenced using an Ion 520 chip on the Ion  
393 S5 system using the Ion 510™ & Ion 520™ & Ion 530™ Kit. Sequences were assembled using  
394 IRMA v. 0.6.7 and visually verified using DNASTar SeqMan NGen v. 14. Mutational analysis  
395 was performed using the GISAID EpiFlu™ Database CoVsurver: Mutation Analysis of hCoV-  
396 19 at <https://www.gisaid.org/epiflu-applications/covsurver-mutations-app>.

397

398 **Visualization of genomic material in tissues:** *In situ* hybridization utilized RNAscope  
399 (Advanced Cell Diagnostics, Hayward, CA) technology to visualize the presence and location

400 viral RNA in tissues harvested from infected mink. A set of anti-sense SARS-CoV-2 specific  
401 RNA probes comprised of 20 Z pairs targeting nucleotides 21,631-23,303 of the spike viral  
402 glycoprotein gene (Genbank accession number NC\_045512.2) was developed by Advanced Cell  
403 Diagnostics (ACD) and performed as previously described [52]. This assay was performed  
404 according to manufacturer's protocols for RNAscope 2.5 HD Red Detection Kit (ACD) with the  
405 following specific conditions. Fresh tissues from four SARS-CoV-2-positive and two SARS-  
406 CoV-2 negative mink were fixed in 10% buffered formalin, embedded in paraffin wax, and  
407 sectioned at 4um on positively charged glass slides. Samples were slowly submerged in lightly  
408 boiling Target Retrieval Solution (ACD) for 15 minutes, followed by application and incubation  
409 of Protease Plus (ACD) at 40°C for 20 minutes. In addition, two SARS-CoV-2 negative mink  
410 were selected from the UVDL tissue achieves as negative controls. A probe specific for a feline  
411 infectious peritonitis virus (FIPV) RNA also generated by ACD as positive and negative  
412 controls. FFPE tissues from a domestic cat with peritonitis due to FIPV-infection was used as  
413 positive assay control. Additionally, these FIPV-infected tissues, FFPE intestinal tissue from a  
414 bovine calf infected with bovine corona virus (confirmed by PCR), a coronavirus positive calf  
415 trachea and nasal turbinates from a domestic cat all were utilized as negative tissue controls and  
416 stained with the SARS-CoV-2 probe to investigate any cross-reactivity to these other  
417 coronaviruses and non-specific reactivity.

418         There was detection of viral RNA in inflamed splenic tissue from an FIPV infected cat,  
419 which served as an assay control. No viral RNA was detected (no cross-reactivity) in the  
420 negative control slides which included applying the SARS-CoV-2 probe to tissues (lung, lymph  
421 node, small intestine and colon) from one healthy adult mink that died of crush injuries prior to  
422 the emergence of SARS-CoV-2, spleen from an FIPV-infected cat, intestines and trachea from a

423 bovine calf infected with bovine coronavirus, and nasal turbinates from a cat with suppurative  
424 rhinitis collect prior to the emergence of SARS-CoV-2. Additionally, there was no FIPV  
425 detection when this probe was applied to the SARS-CoV-2 positive mink nasal turbinates and  
426 lungs (Fig 4c,f).

427

428

#### 429 **Acknowledgements**

430 We would like to acknowledge the Utah mink breeders whose cooperation allowed this work.  
431 Additionally, we would like to acknowledge both the United States Food and Drug  
432 Administration Veterinary Laboratory Investigation and Response Network (VetLIRN) and the  
433 United States Department of Agriculture National Animal Health Laboratory Network (NAHLN)  
434 for their assistance in funding this project.

435

436

#### 437 **References**

- 438 1. Huang C, Wang Y, Li X, Ren L, Zhao J, Hu Y, et al. Clinical features of patients infected  
439 with 2019 novel coronavirus in Wuhan, China. *Lancet*. 2020; doi:10.1016/S0140-  
440 6736(20)30183-5
- 441 2. Zhou P, Yang X Lou, Wang XG, Hu B, Zhang L, Zhang W, et al. A pneumonia outbreak  
442 associated with a new coronavirus of probable bat origin. *Nature*. Springer US; 2020;579:  
443 270–273. doi:10.1038/s41586-020-2012-7
- 444 3. Lu R, Zhao X, Li J, Niu P, Yang B, Wu H, et al. Genomic characterisation and  
445 epidemiology of 2019 novel coronavirus: implications for virus origins and receptor

- 446 binding. *Lancet*. Elsevier Ltd; 2020;395: 565–574. doi:10.1016/S0140-6736(20)30251-8
- 447 4. Olival KJ, Cryan PM, Amman BR, Baric RS, Blehert DS, Brook CE, et al. Possibility for  
448 reverse zoonotic transmission of SARS-CoV-2 to free-ranging wildlife: A case study of  
449 bats. *PLoS Pathog*. 2020;In Press: 1–19. doi:10.1371/journal.ppat.1008758
- 450 5. Peiris JSM, Lai ST, Poon LLM, Guan Y, Yam LYC, Lim W, et al. Coronavirus as a  
451 possible cause of severe acute respiratory syndrome. *Lancet*. 2003;361: 1319–1325.  
452 doi:10.1016/S0140-6736(03)13077-2
- 453 6. Zaki AM, Van Boheemen S, Bestebroer TM, Osterhaus ADME, Fouchier RAM. Isolation  
454 of a novel coronavirus from a man with pneumonia in Saudi Arabia. *N Engl J Med*. 2012;  
455 doi:10.1056/NEJMoa1211721
- 456 7. Martina BEE, Haagmans BL, Kuiken T, Fouchier RAM, Rimmelzwaan GF, Van  
457 Amerongen G, et al. SARS virus infection of cats and ferrets. *Nature*. 2003;425: 915.  
458 doi:10.1038/425915a
- 459 8. Brand V den, Leijten haagmans L, Riel V, Martina. Pathology of Experimental SARS  
460 Coronavirus Infection in Cats and Ferrets. *Vet Pathol*. 2008;562: 551–562.
- 461 9. McAuliffe J, Vogel L, Roberts A, Fahle G, Fischer S, Shieh WJ, et al. Replication of  
462 SARS coronavirus administered into the respiratory tract of African Green, rhesus and  
463 cynomolgus monkeys. *Virology*. 2004; doi:10.1016/j.virol.2004.09.030
- 464 10. Fouchier RAM, Kuiken T, Schutten M, Van Amerongen G, Van Doornum GJJ, Van Den  
465 Hoogen BG, et al. Koch's postulates fulfilled for SARS virus. *Nature*. 2003;  
466 doi:10.1038/423240a
- 467 11. Lawler J V., Endy TP, Hensley LE, Garrison A, Fritz EA, Lesar M, et al. Cynomolgus  
468 macaque as an animal model for severe acute respiratory syndrome. *PLoS Med*. 2006;

- 469           doi:10.1371/journal.pmed.0030149
- 470   12.   Roberts A, Vogel L, Guarner J, Hayes N, Murphy B, Zaki S, et al. Severe Acute  
471       Respiratory Syndrome Coronavirus Infection of Golden Syrian Hamsters. *J Virol.* 2005;  
472       doi:10.1128/jvi.79.1.503-511.2005
- 473   13.   Subbarao K, McAuliffe J, Vogel L, Fahle G, Fischer S, Tatti K, et al. Prior Infection and  
474       Passive Transfer of Neutralizing Antibody Prevent Replication of Severe Acute  
475       Respiratory Syndrome Coronavirus in the Respiratory Tract of Mice. *J Virol.* 2004;  
476       doi:10.1128/jvi.78.7.3572-3577.2004
- 477   14.   Peck KM, Burch CL, Heise MT, Baric RS. Coronavirus Host Range Expansion and  
478       Middle East Respiratory Syndrome Coronavirus Emergence: Biochemical Mechanisms  
479       and Evolutionary Perspectives. *Annual Review of Virology.* 2015. doi:10.1146/annurev-  
480       virology-100114-055029
- 481   15.   Shi J, Wen Z, Zhong G, Yang H, Wang C, Huang B, et al. Susceptibility of ferrets, cats,  
482       dogs, and other domesticated animals to SARS-coronavirus 2. *Science* (80- ). 2020;368:  
483       1016–1020. doi:10.1126/science.abb7015
- 484   16.   Kim Y Il, Kim SG, Kim SM, Kim EH, Park SJ, Yu KM, et al. Infection and Rapid  
485       Transmission of SARS-CoV-2 in Ferrets. *Cell Host Microbe.* Elsevier Inc.; 2020;27: 704-  
486       709.e2. doi:10.1016/j.chom.2020.03.023
- 487   17.   Oreshkova N, Moelnaar RJ, Vreman S, Harders F, Munnink BBO, Van Der Honin RWH,  
488       et al. SARS-CoV-2 infection in farmed minks , the. *Euro Surveill.* 2020;25 (23): 1–7.  
489       Available: <https://doi.org/10.2807/1560-7917.ES.2020.25.23.2001005>
- 490   18.   Richard M, Kok A, de Meulder D, Bestebroer TM, Lamers MM, Okba NMA, et al.  
491       SARS-CoV-2 is transmitted via contact and via the air between ferrets. *Nat Commun.*

- 492 2020; doi:10.1038/s41467-020-17367-2
- 493 19. Schlottau K, Rissmann M, Graaf A, Schön J, Sehl J, Wylezich C, et al. SARS-CoV-2 in  
494 fruit bats, ferrets, pigs, and chickens: an experimental transmission study. *The Lancet*  
495 *Microbe*. 2020; doi:10.1016/s2666-5247(20)30089-6
- 496 20. Letko M, Marzi A, Munster V. Functional assessment of cell entry and receptor usage for  
497 SARS-CoV-2 and other lineage B betacoronaviruses. *Nat Microbiol*. Springer US; 2020;5:  
498 562–569. doi:10.1038/s41564-020-0688-y
- 499 21. Sia SF, Yan LM, Chin AWH, Fung K, Choy KT, Wong AYL, et al. Pathogenesis and  
500 transmission of SARS-CoV-2 in golden hamsters. *Nature*. Springer US; 2020;583.  
501 doi:10.1038/s41586-020-2342-5
- 502 22. Zhao Y, Wang J, Kuang D, Xu J, Yang M, Ma C, et al. Susceptibility of tree shrew to  
503 SARS-CoV-2 infection. *Sci Rep*. 2020; doi:10.1038/s41598-020-72563-w
- 504 23. Suarez DL, Pantin-Jackwood MJ, Swayne DE, Lee SA, DeBlois SM, Spackman E. Lack  
505 of Susceptibility to SARS-CoV-2 and MERS-CoV in Poultry. *Emerg Infect Dis*. 2020;26:  
506 3074–3076. doi:10.3201/eid2612.202989
- 507 24. Chu YK, Ali GD, Jia F, Li Q, Kelvin D, Couch RC, et al. The SARS-CoV ferret model in  
508 an infection-challenge study. *Virology*. 2008;374: 151–163.  
509 doi:10.1016/j.virol.2007.12.032
- 510 25. Ulrich L, Wernike K, Hoffmann D, Mettenleiter TC, Beer M. Experimental infection of  
511 cattle with SARS-CoV-2. *Emerg Infect Dis*. 2020;26: 2979–2981.  
512 doi:10.3201/EID2612.203799
- 513 26. Munster VJ, Feldmann F, Williamson BN, van Doremalen N, Pérez-Pérez L, Schulz J, et  
514 al. Respiratory disease in rhesus macaques inoculated with SARS-CoV-2. *Nature*. 2020;

- 515           doi:10.1038/s41586-020-2324-7
- 516   27.   Salajegheh Tazerji S, Magalhães Duarte P, Rahimi P, Shahabinejad F, Dhakal S, Singh  
517       Malik Y, et al. Transmission of severe acute respiratory syndrome coronavirus 2 (SARS-  
518       CoV-2) to animals: An updated review. *J Transl Med. BioMed Central*; 2020;18: 1–11.  
519       doi:10.1186/s12967-020-02534-2
- 520   28.   Sit THC, Brackman CJ, Ip SM, Tam KWS, Law PYT, To EMW, et al. Infection of dogs  
521       with SARS-CoV-2. *Nature. Springer US*; 2020; doi:10.1038/s41586-020-2334-5
- 522   29.   Center of Disease Control and Prevention. Confirmation of COVID-19 in two pet cats in  
523       New York [Internet]. 2020. Available: [https://www.cdc.gov/media/releases/2020/s0422-](https://www.cdc.gov/media/releases/2020/s0422-covid-19-cats-NYC.html)  
524       covid-19-cats-NYC.html
- 525   30.   Animal and Plant Health Service U. USDA Statement on the Confirmation of COVID-19  
526       in a Tiger in New York [Internet]. 2020. Available:  
527       [https://www.aphis.usda.gov/aphis/newsroom/news/sa\\_by\\_date/sa-2020/ny-zoo-covid-19](https://www.aphis.usda.gov/aphis/newsroom/news/sa_by_date/sa-2020/ny-zoo-covid-19)
- 528   31.   Center of Disease Control and Prevention. COVID-19 and Animals [Internet]. 2020.  
529       Available: <https://www.cdc.gov/coronavirus/2019-ncov/daily-life-coping/animals.html>
- 530   32.   World Organisation for Animal Health. COVID-19 Portal; Events in Animals [Internet].  
531       2021. Available: [https://www.oie.int/en/scientific-expertise/specific-information-and-](https://www.oie.int/en/scientific-expertise/specific-information-and-recommendations/questions-and-answers-on-2019-novel-coronavirus/events-in-animals/)  
532       recommendations/questions-and-answers-on-2019-novel-coronavirus/events-in-animals/
- 533   33.   Oreshkova N, Molenaar RJ, Vreman S, Harders F, Oude Munnink BB, Van Der Honing  
534       RWH, et al. SARS-CoV-2 infection in farmed minks, the Netherlands, April and May  
535       2020. *Eurosurveillance*. 2020; doi:10.2807/1560-7917.ES.2020.25.23.2001005
- 536   34.   Hammer AS, Quaade ML, Rasmussen TB, Fonager J, Rasmussen M, Mundbjerg K et al.  
537       SARS-CoV-2 transmission between mink (*Neovison vison*) and humans, Denmark.



- 538           Emerg Infect Dis. 2021; doi:<https://doi.org/10.3201/eid2702.203794>
- 539   35.   Rabalski L, Kosinski M, Smura T, Aaltonen K, Kant R, Sironen T, et al. Detection and  
540           molecular characterisation of SARS-CoV-2 in farmed mink (Neovision vision) in Poland.  
541           bioRxiv. 2020; doi:10.1101/2020.12.24.422670
- 542   36.   Sharun K, Tiwari R, Natesan S, Dhama K. SARS-CoV-2 infection in farmed minks,  
543           associated zoonotic concerns, and importance of the One Health approach during the  
544           ongoing COVID-19 pandemic. *Vet Q*. Taylor & Francis; 2021;41: 50–60.  
545           doi:10.1080/01652176.2020.1867776
- 546   37.   Molenaar RJ, Vreman S, Hakze-van der Honing RW, Zwart R, de Rond J, Weesendorp E,  
547           et al. Clinical and Pathological Findings in SARS-CoV-2 Disease Outbreaks in Farmed  
548           Mink (Neovision vison). *Vet Pathol*. 2020; 1–5. doi:10.1177/0300985820943535
- 549   38.   Munnink BBO, Sikkema RS, Nieuwenhuijse DF, Molenaar RJ, Munger E, Molenkamp R,  
550           et al. Transmission of SARS-CoV-2 on mink farms between humans and mink and back  
551           to humans. *Science* (80- ). 2021;371: 172–177. doi:10.1126/science.abe5901
- 552   39.   USDA. Cases of SARS-CoV-2 in Animals in the United States [Internet]. 2020.  
553           Available: [https://www.aphis.usda.gov/animal\\_health/one\\_health/downloads/sars-cov2-in-](https://www.aphis.usda.gov/animal_health/one_health/downloads/sars-cov2-in-animals.pdf)  
554           animals.pdf
- 555   40.   Tian S, Xiong Y, Liu H, Niu L, Guo J, Liao M, et al. Pathological study of the 2019 novel  
556           coronavirus disease (COVID-19) through postmortem core biopsies. *Mod Pathol*. Springer  
557           US; 2020;33: 1007–1014. doi:10.1038/s41379-020-0536-x
- 558   41.   Al Nemer A. Histopathologic and autopsy findings in patients diagnosed with coronavirus  
559           disease 2019 (COVID-19): What we know so far based on correlation with clinical,  
560           morphologic and pathobiological aspects. *Adv Anat Pathol*. 2020;27: 363–370.

- 561 doi:10.1097/PAP.0000000000000276
- 562 42. Ackermann M, Verleden SE, Kuehnel M, Haverich A, Welte T, Laenger F, et al.  
563 Pulmonary Vascular Endothelialitis, Thrombosis, and Angiogenesis in Covid-19. *N Engl J*  
564 *Med.* 2020; 120–128. doi:10.1056/nejmoa2015432
- 565 43. Massoth LR, Desai N, Szabolcs A, Harris CK, Neyaz A, Crotty R, et al. Comparison of  
566 RNA in Situ Hybridization and Immunohistochemistry Techniques for the Detection and  
567 Localization of SARS-CoV-2 in Human Tissues. *Am J Surg Pathol.* 2020;45: 14–24.  
568 doi:10.1097/PAS.0000000000001563
- 569 44. Díez-Fuertes F, Iglesias-Caballero M, Monzón S, Jiménez P, Varona S, Cuesta I, et al.  
570 Phylodynamics of SARS-CoV-2 transmission in Spain. 2020;  
571 doi:10.1101/2020.04.20.050039
- 572 45. Islam OK, Al-Emran HM, Hasan MS, Anwar A, Jahid MIK, Hossain MA. Emergence of  
573 European and North American mutant variants of SARS-CoV-2 in South-East Asia.  
574 *Transbound Emerg Dis.* 2020; doi:10.1111/tbed.13748
- 575 46. L Ponoop Prasad Patro†, Chakkarai Sathyaseelan† PPU and TR, Patro LPP, Sathyaseelan  
576 C, Uttamrao PP, Rathinavelan T. Global variation in the SARS-CoV-2 proteome reveals  
577 the mutational hotspots in the drug and vaccine candidates. *bioRxiv.* 2020;
- 578 47. Ilmjärv S, Abdul F, Acosta-Gutiérrez S, Estarellas C, Galdadas I, Casimir M, et al.  
579 Epidemiologically most successful SARS-CoV-2 variant: concurrent mutations in RNA-  
580 dependent RNA polymerase and spike protein. *medRxiv.* 2020;
- 581 48. Ahamad S, Kanipakam H, Gupta D. Insights into the structural and dynamical changes of  
582 spike glycoprotein mutations associated with SARS-CoV-2 host receptor binding. *J*  
583 *Biomol Struct Dyn.* 2020; doi:10.1080/07391102.2020.1811774

- 584 49. Alouane T, Laamarti M, Essabbar A, Hakmi M, Bouricha EM, Chemaou-Elfihri MW, et al.  
585 Genomic diversity and hotspot mutations in 30,983 SARS-CoV-2 genomes: Moving  
586 toward a universal vaccine for the “confined virus”? *Pathogens*. 2020;  
587 doi:10.3390/pathogens9100829
- 588 50. Issa E, Merhi G, Panossian B, Salloum T, Tokajian S. SARS-CoV-2 and ORF3a: Non-  
589 Synonymous Mutations and Polyproline Regions. *mSystems*. 2020;  
590 doi:10.1101/2020.03.27.012013
- 591 51. Corman VM, Landt O, Kaiser M, Molenkamp R, Meijer A, Chu DK, et al. Detection of  
592 2019 -nCoV by RT-PCR. *Euro Surveill*. 2020;25: 1–8. doi:10.2807/1560-  
593 7917.ES.2020.25.3.2000045
- 594 52. Carossino M, Ip HS, Richt JA, Shultz K, Harper K, Loynachan AT, et al. Detection of  
595 SARS-CoV-2 by RNAscope® in situ hybridization and immunohistochemistry  
596 techniques. *Arch Virol*. Springer Vienna; 2020; doi:10.1007/s00705-020-04737-w

597

598

### 599 **Supporting Information Captions**

#### 600 **Figure 1: Clinical and gross necropsy findings in SARS-CoV-2 infected mink**

601 a. A mucopurulent nasal discharge, indicative of rhinitis, stains the fur surrounding the nares in a  
602 SARS-CoV-2 infected mink. b. Gross image of severe pulmonary congestion and edema of an  
603 infected mink.

604

#### 605 **Figure 2: Pulmonary histopathology of SARS-CoV-2 infected mink**

606 a. Lung from an adult mink with large cuffs of mononuclear inflammatory cells and edema  
607 multifocally surrounding pulmonary vessels. 20x H&E. b. Alveolar spaces are multifocally filled  
608 with eosinophilic edema fluid. 40x H&E. c. Bronchioles are lined with proliferative, slightly  
609 disorganized hyperplastic epithelium and type II pneumocyte hyperplasia is present in alveoli  
610 associated with increased intra-alveolar inflammation. 100x H&E. d. Neutrophils, fewer  
611 macrophages, and strands of fibrin are multifocally present in alveoli. 200x H&E.

612

613 **Figure 3: Detection of SARS-CoV-2 RNA in tissues by RT-PCR and ISH**

614 a. Tissues where viral RNA was not detected are represented by “ND” and tissues not  
615 collected/not tested are represented by an empty space. CT, cycle threshold. b. Tissues in which  
616 viral RNA was detected by a chromogenic signal by ISH are represented with a “+”, and “-“  
617 when not detected.

618

619 **Figure 4: Detection of SARS-CoV-2 RNA in tissues by ISH**

620 Figures a-c. Nasal turbinate samples from SARS-CoV-2 infected mink 5. a. H&E image of  
621 suppurative and histiocytic rhinitis filling the nasal passage. b. Detection of SARS-CoV-2 RNA  
622 in the nasal exudate. c. No detection of FIPV RNA in nasal turbinate of SARS-CoV-2 infected  
623 mink (negative control). Figures d-e d. Nasal turbinate samples from SARS-CoV-2 infected  
624 mink 5 demonstrating mild rhinitis in the caudal nasal passage and mild disorganization of  
625 respiratory epithelial cells e. Detection of SARS-CoV-2 viral RNA within respiratory epithelial  
626 cells of mink 5. f. No detection of FIPV RNA in nasal turbinate epithelial cells of SARS-CoV-2  
627 infected mink (negative control). g-h Lung samples from SARS-CoV-2 infected mink 1. g. H&E  
628 image of bronchus with attenuation and multifocal loss of respiratory epithelial cells. h.

- 629 Detection of SARS-CoV-2 viral RNA within respiratory epithelial cells of the bronchus. i-j
- 630 Trachea samples from SARS-CoV-2 infected mink 1. i. H&E image of trachea with mild
- 631 attenuation and multifocal disorganization of respiratory epithelial cells. j. Detection of SARS-
- 632 CoV-2 viral RNA within respiratory epithelial cells of the trachea.

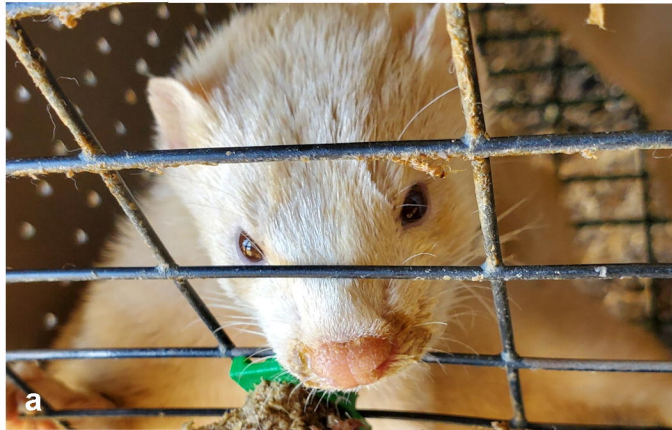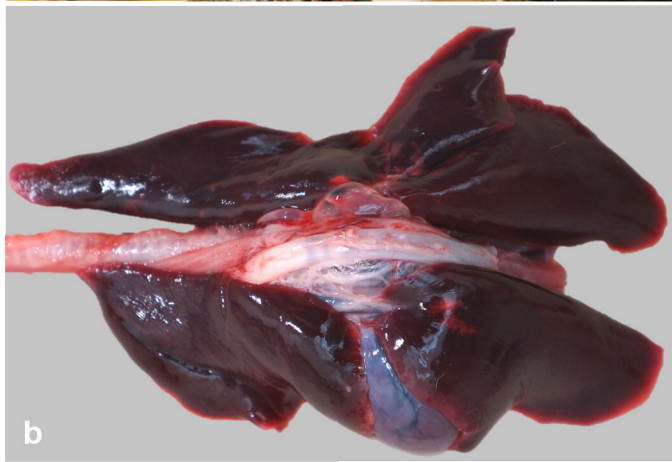



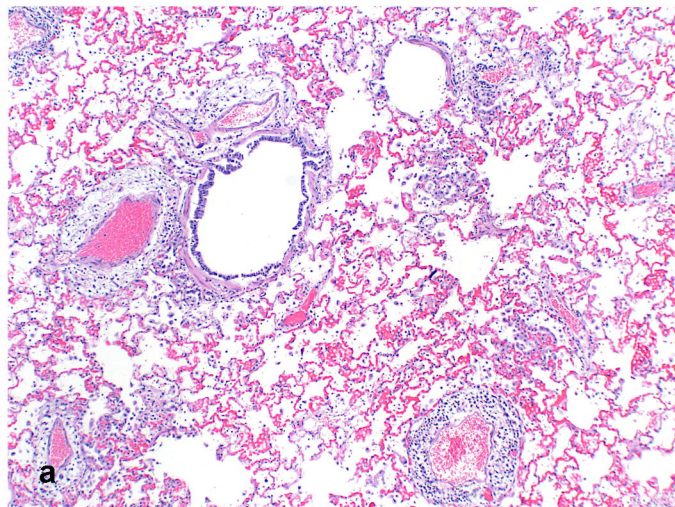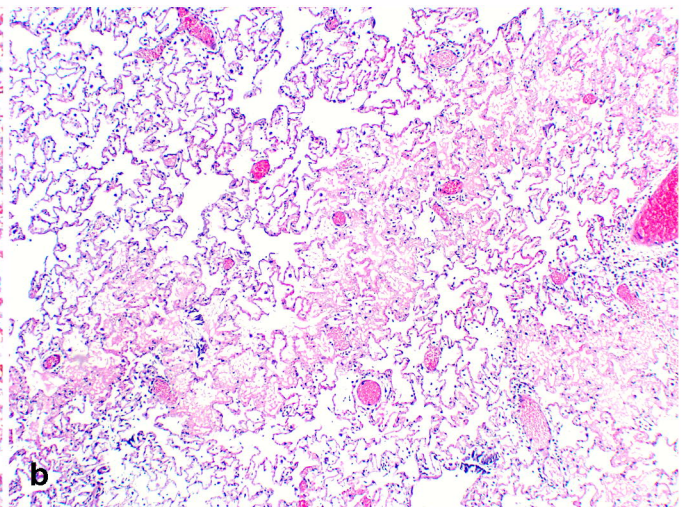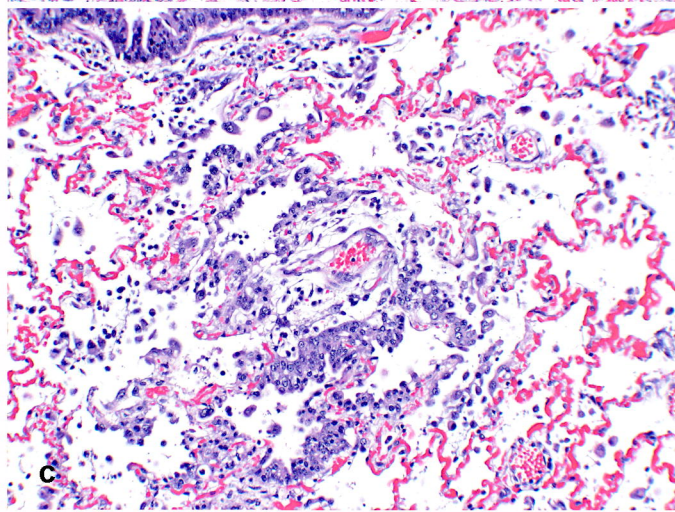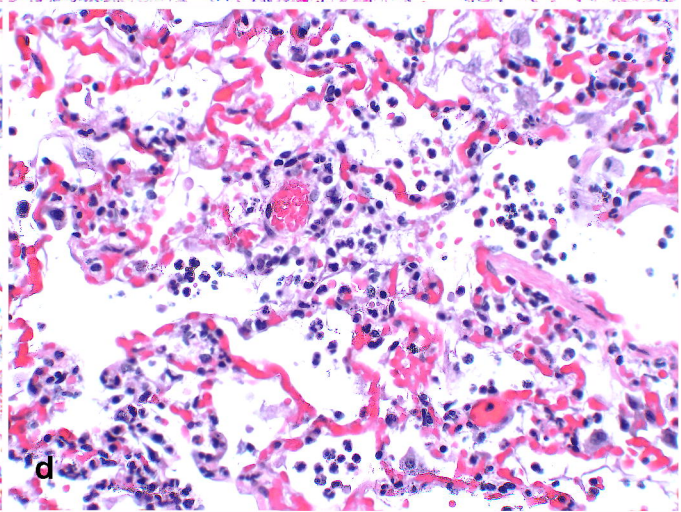

## ISH SARS-CoV-2

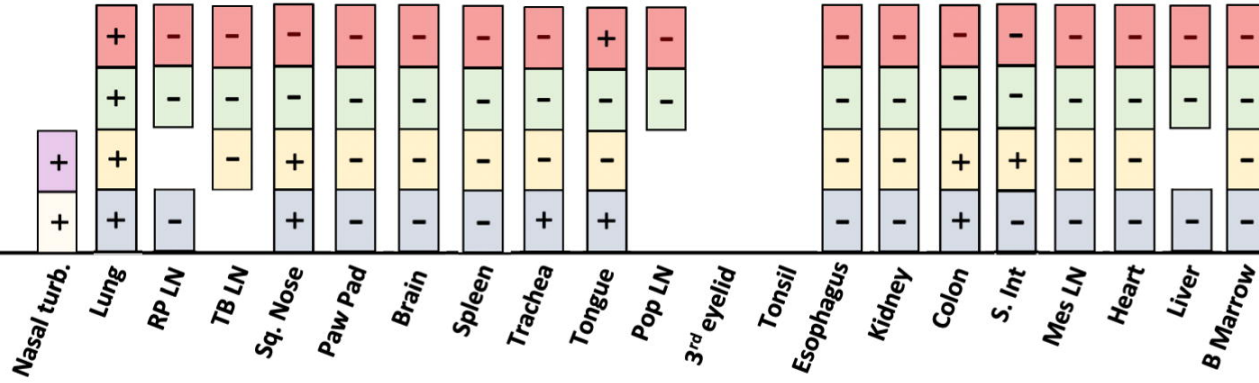

## RT-PCR SARS-CoV-2

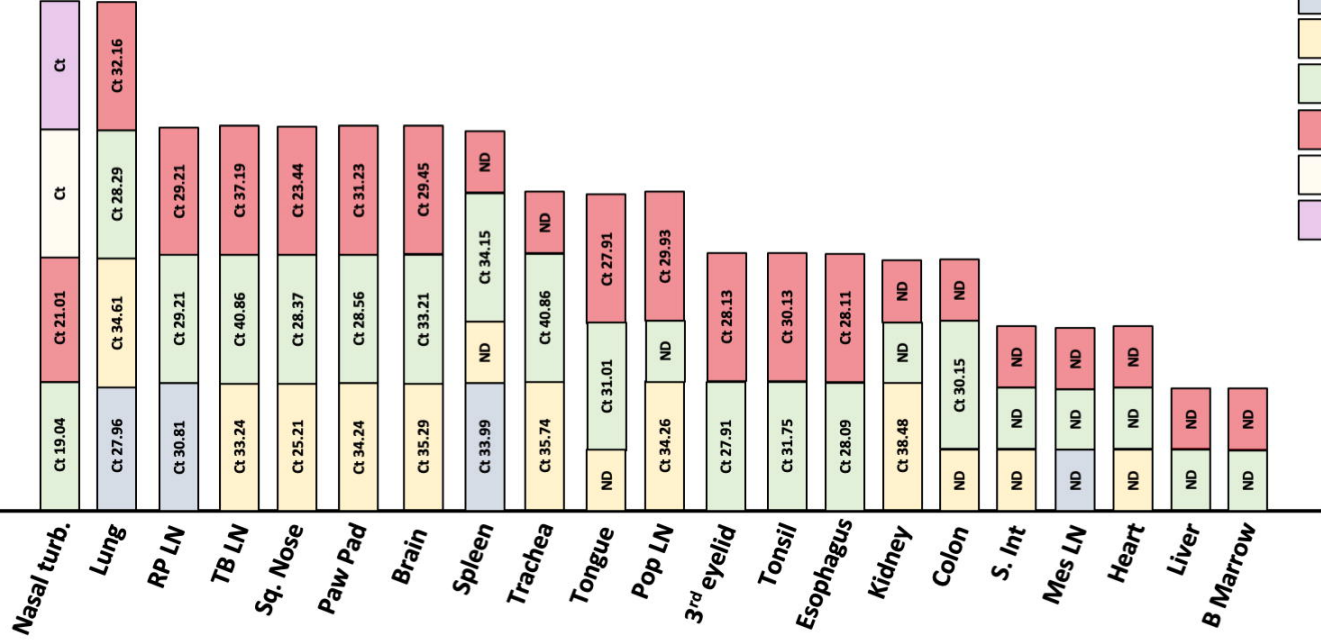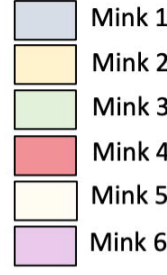



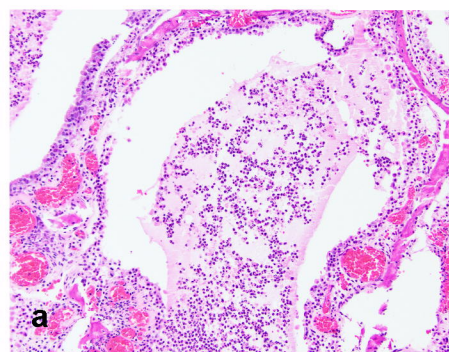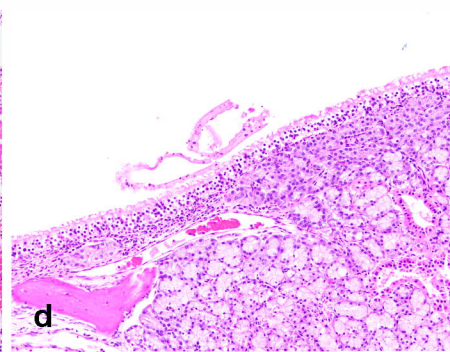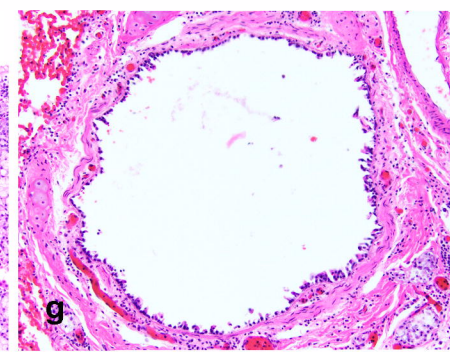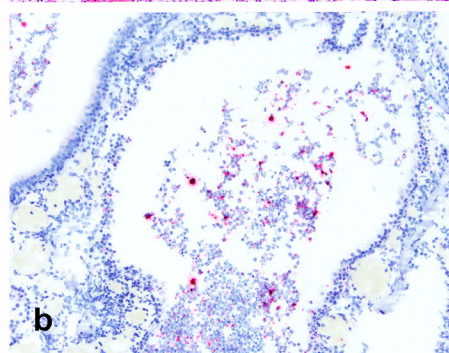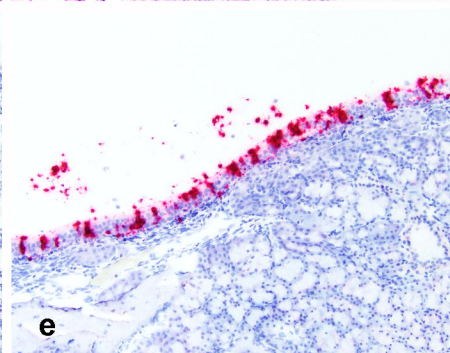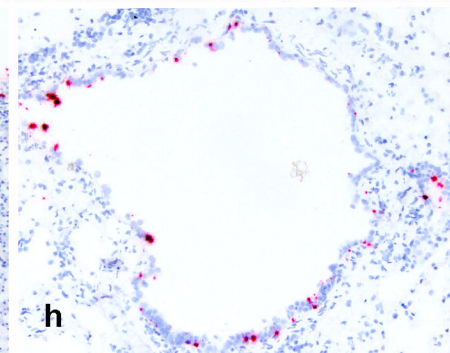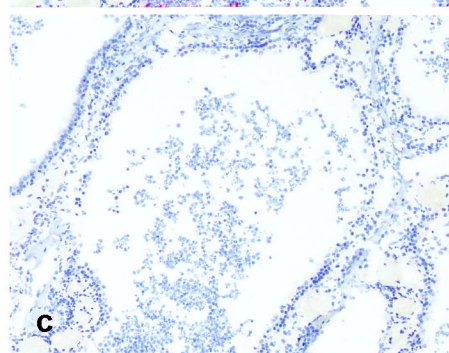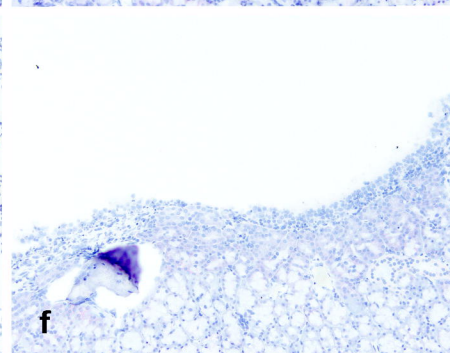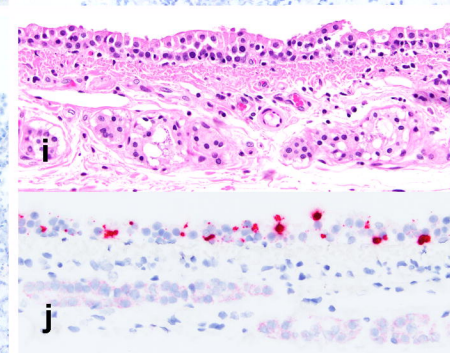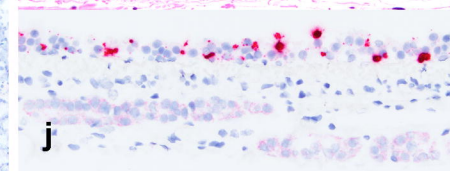

Source: http://biorxiv.org/content/10.1101/2021.06.09.447754v1.full.pdf
